# Supplementary material for: Spin-crossover in the Fe(4X-pyridine)2[Fe(CN)5NO] series with X = Cl, Br, and I. Role of the distortion for the iron atom coordination environment
Source: Royal Society of Chemistry journal article supplement (doi:10.1039/d2nj05141a), 2022-11-21
Supplement: d2nj05141a1.pdf [file d2nj05141a1.pdf]

Spin-crossover in the  $\text{Fe}(4\text{X-pyridine})_2[\text{Fe}(\text{CN})_5\text{NO}]$  series with  $\text{X} = \text{Cl}, \text{Br},$  and  $\text{I}$ .  
Role of the distortion for the iron atom coordination environment.

Y. Avila, R. Mojica, M. C. Vázquez, L. Sánchez, M. González, J. Rodríguez-Hernández\*, E. Reguera

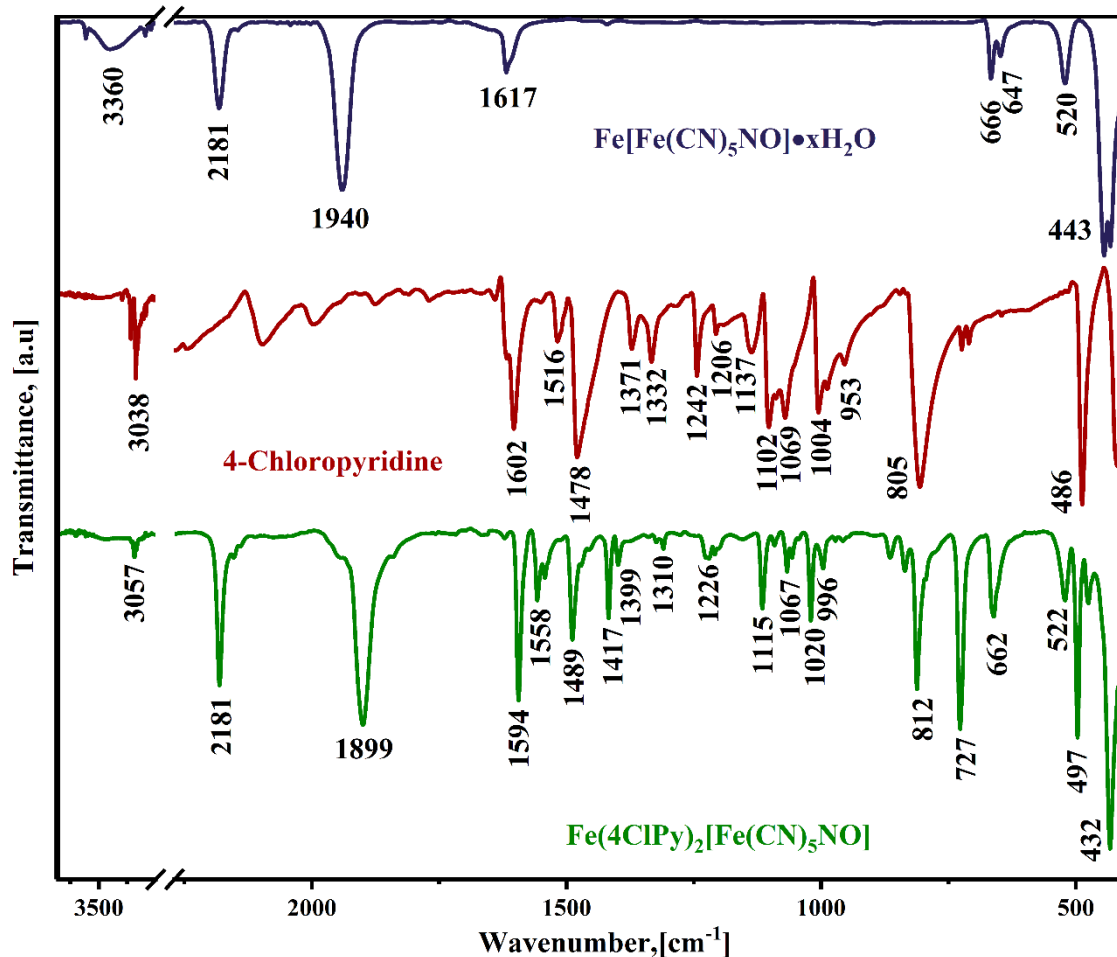

Figure S1. IR spectra for ferrous nitroprussides (cubic phase), 4-Chloropyridine, and the solid formed by the precipitation reaction of sodium nitroprusside, ferrous ammonium sulfate, and this organic ligand.

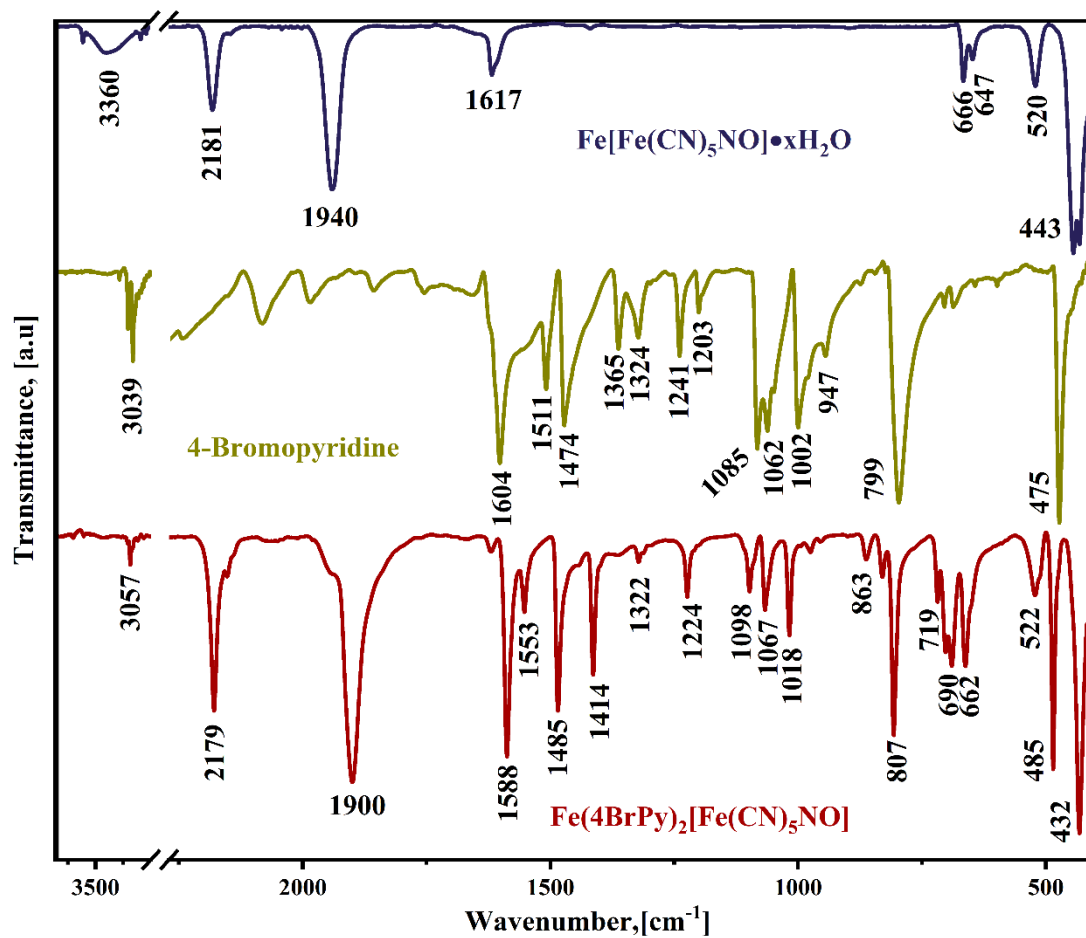

Figure S2. IR spectra for ferrous nitroprussides (cubic phase), 4-Bromopyridine, and the solid formed by the precipitation reaction of sodium nitroprusside, ferrous ammonium sulfate, and this organic ligand.

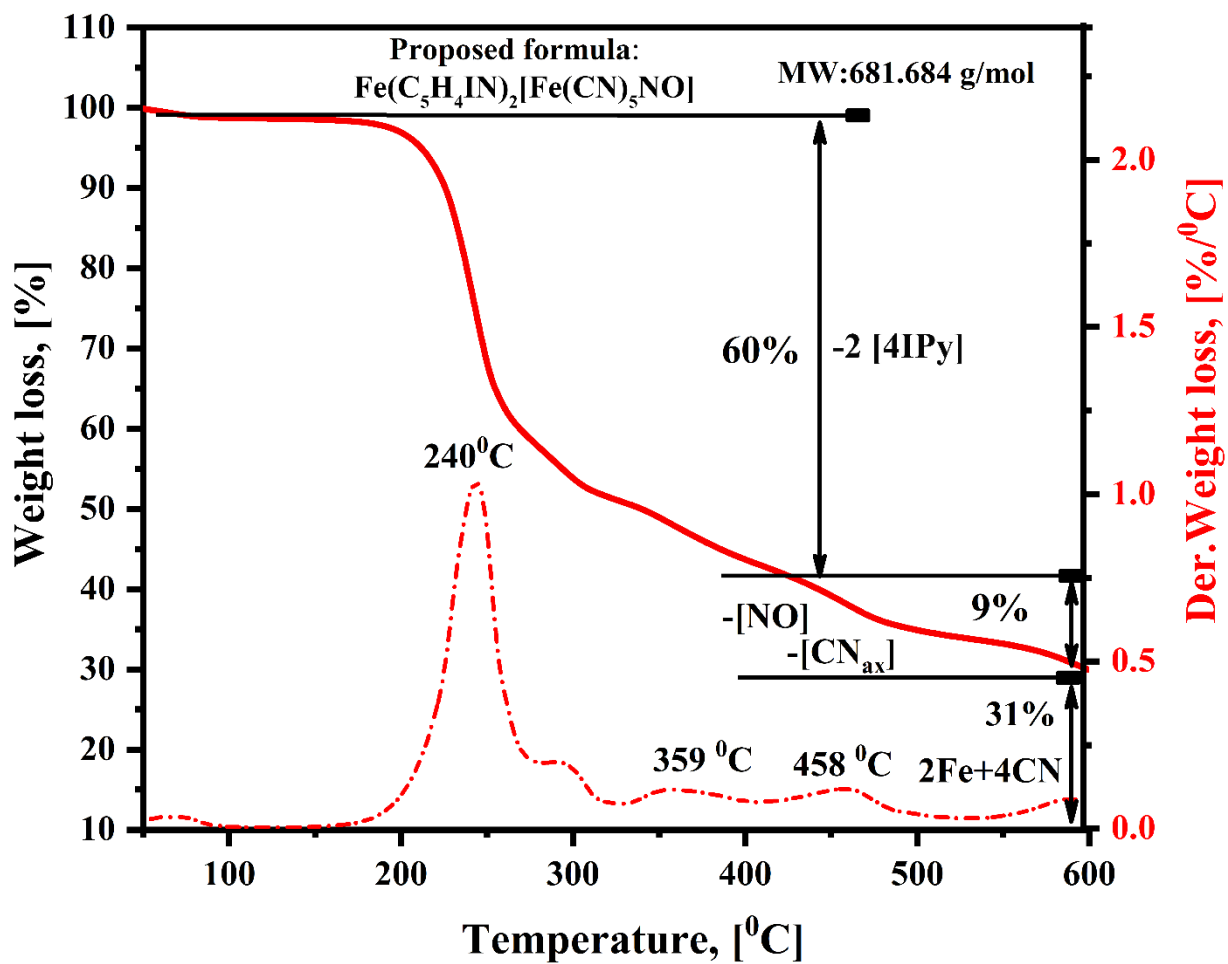

Figure S3. TG curve for the solid formed from the precipitation reaction of aqueous solutions of  $\text{Na}_2[\text{Fe}(\text{CN})_5\text{NO}] \cdot 2\text{H}_2\text{O}$ , Mohr salt,  $\text{Fe}(\text{NH}_4)_2\text{Fe}(\text{SO}_4)_2(\text{H}_2\text{O})_6$ , and the organic ligand (4IPy = 4-Iodopyridine).

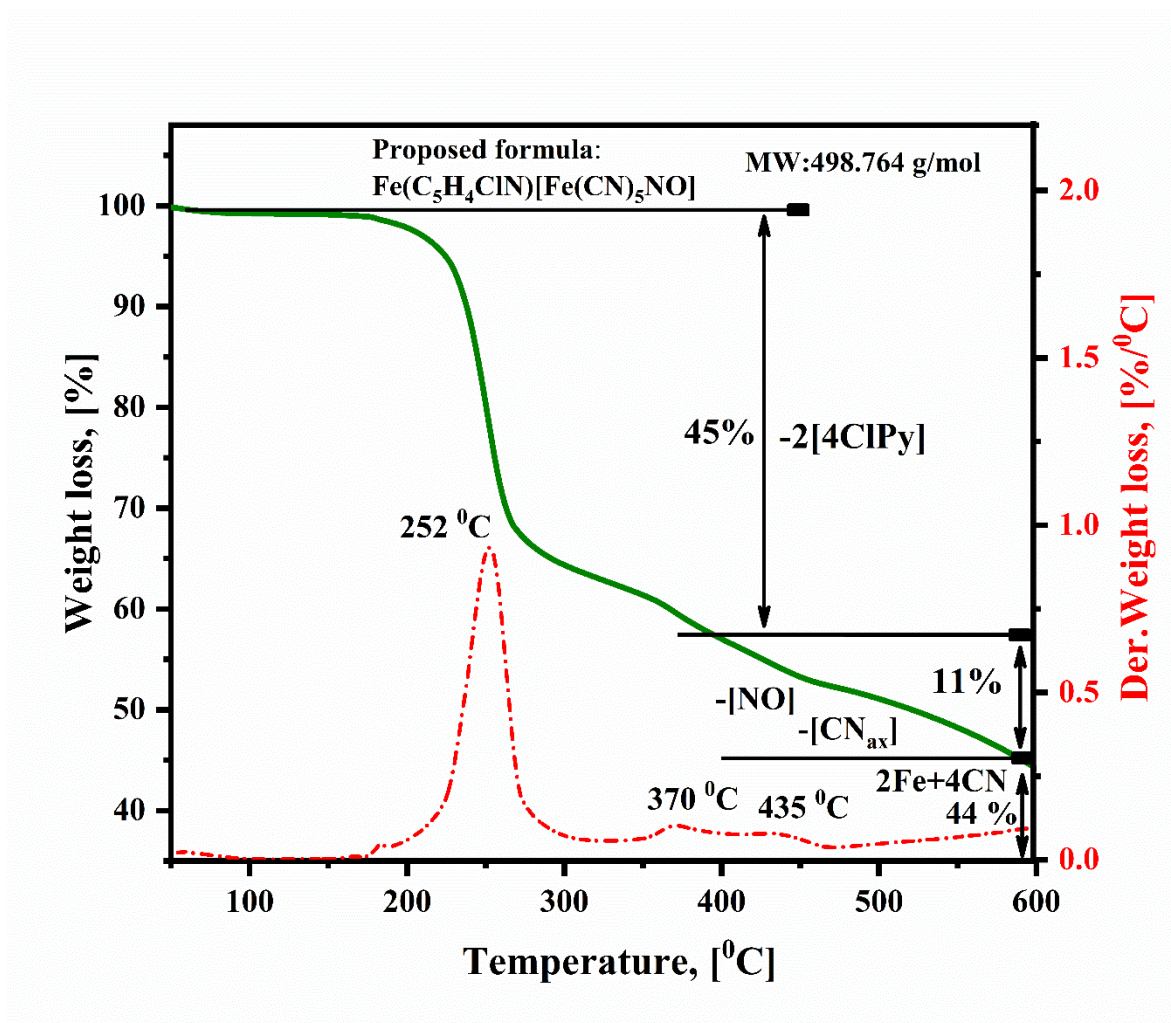

Figure S4. T.G. curve for the solid formed from the precipitation reaction of aqueous solutions of  $\text{Na}_2[\text{Fe}(\text{CN})_5\text{NO}] \cdot 2\text{H}_2\text{O}$ , Mohr salt,  $\text{Fe}(\text{NH}_4)_2(\text{SO}_4)_2(\text{H}_2\text{O})_6$ , and the organic ligand (4ClPy = 4 Chloropyridine).

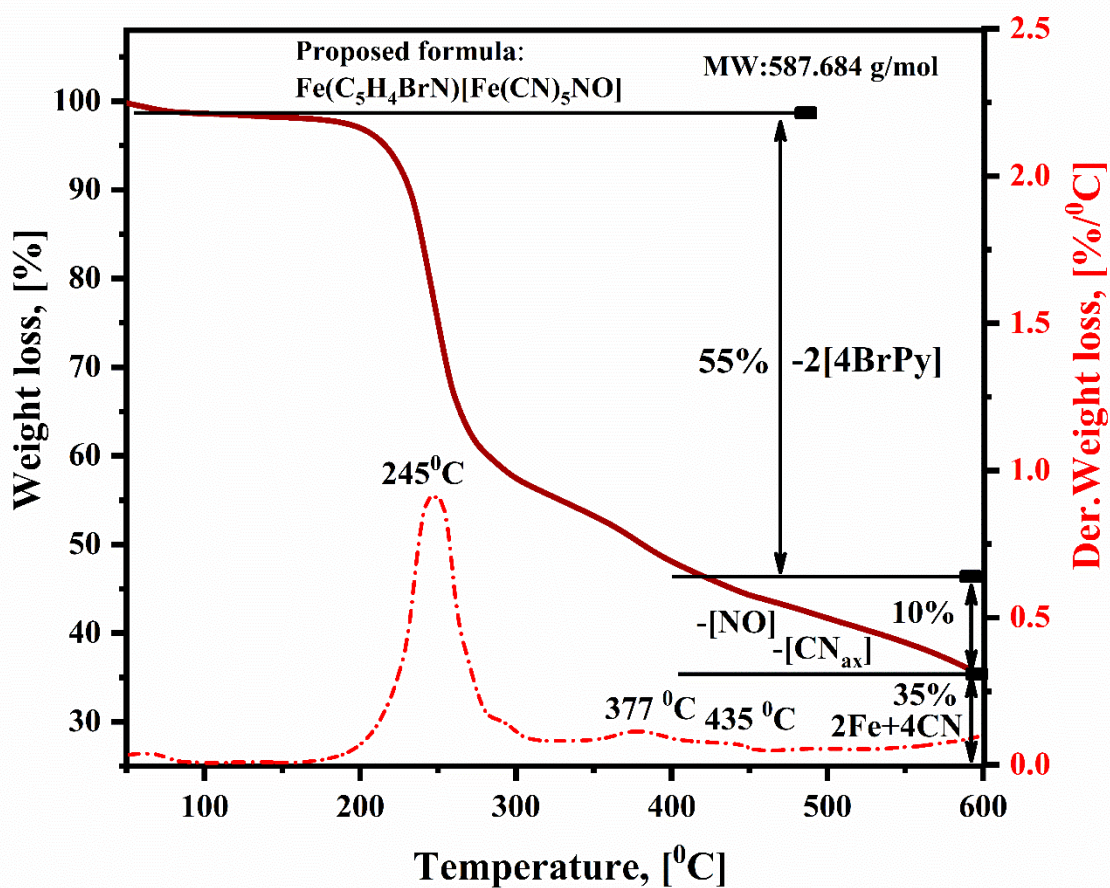

Figure S5. T.G. curve for the solid formed from the precipitation reaction of aqueous solutions of  $\text{Na}_2[\text{Fe}(\text{CN})_5\text{NO}] \cdot 2\text{H}_2\text{O}$ , Mohr salt,  $\text{Fe}(\text{NH}_4)_2\text{Fe}(\text{SO}_4)_2(\text{H}_2\text{O})_6$ , and the organic ligand (4BrPy = 4 Bromopyridine).

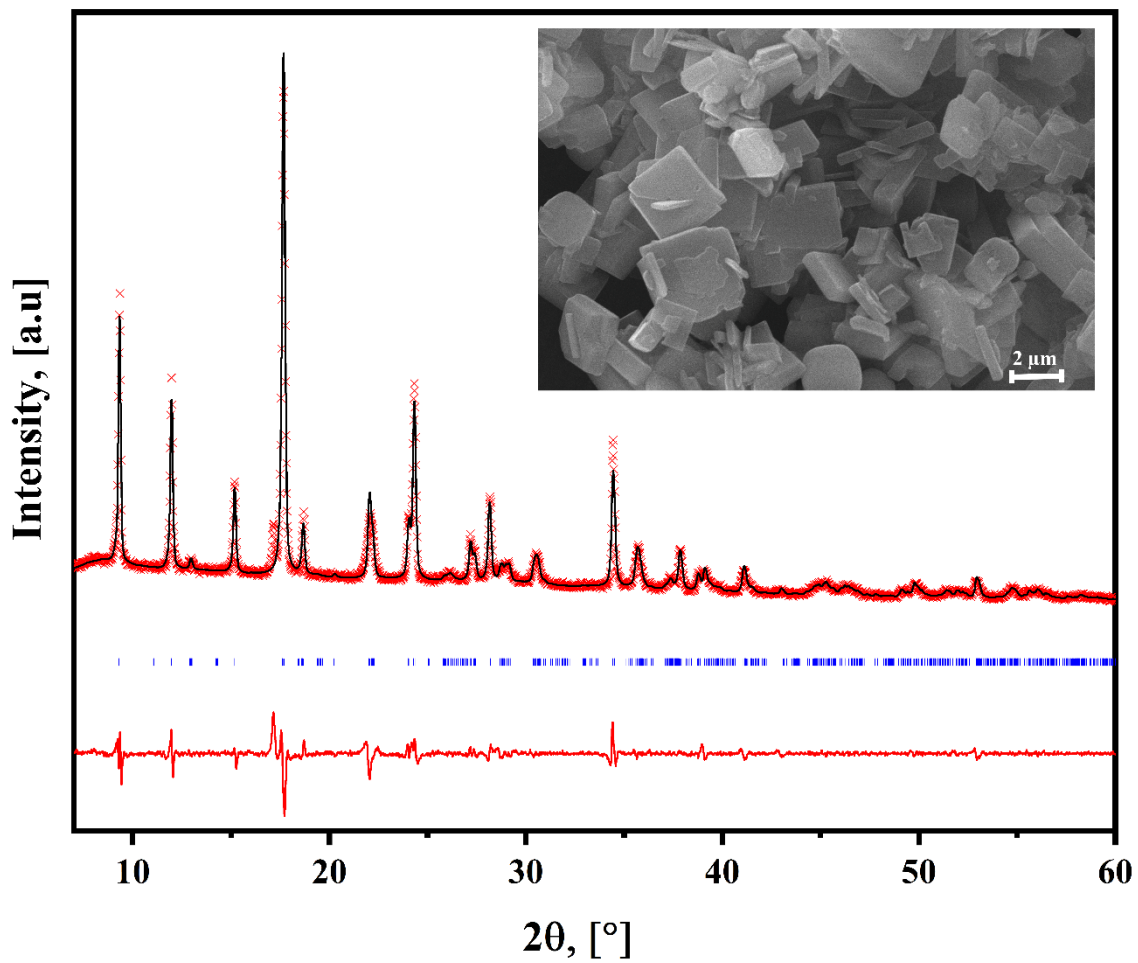

Figure S6. Experimental and fitted XRD powder patterns and their difference for  $\text{Fe}(\text{4ClPy})_2[\text{Fe}(\text{CN})_5\text{NO}]$ . Inset: Morphology for the crystallites of the obtained solid.

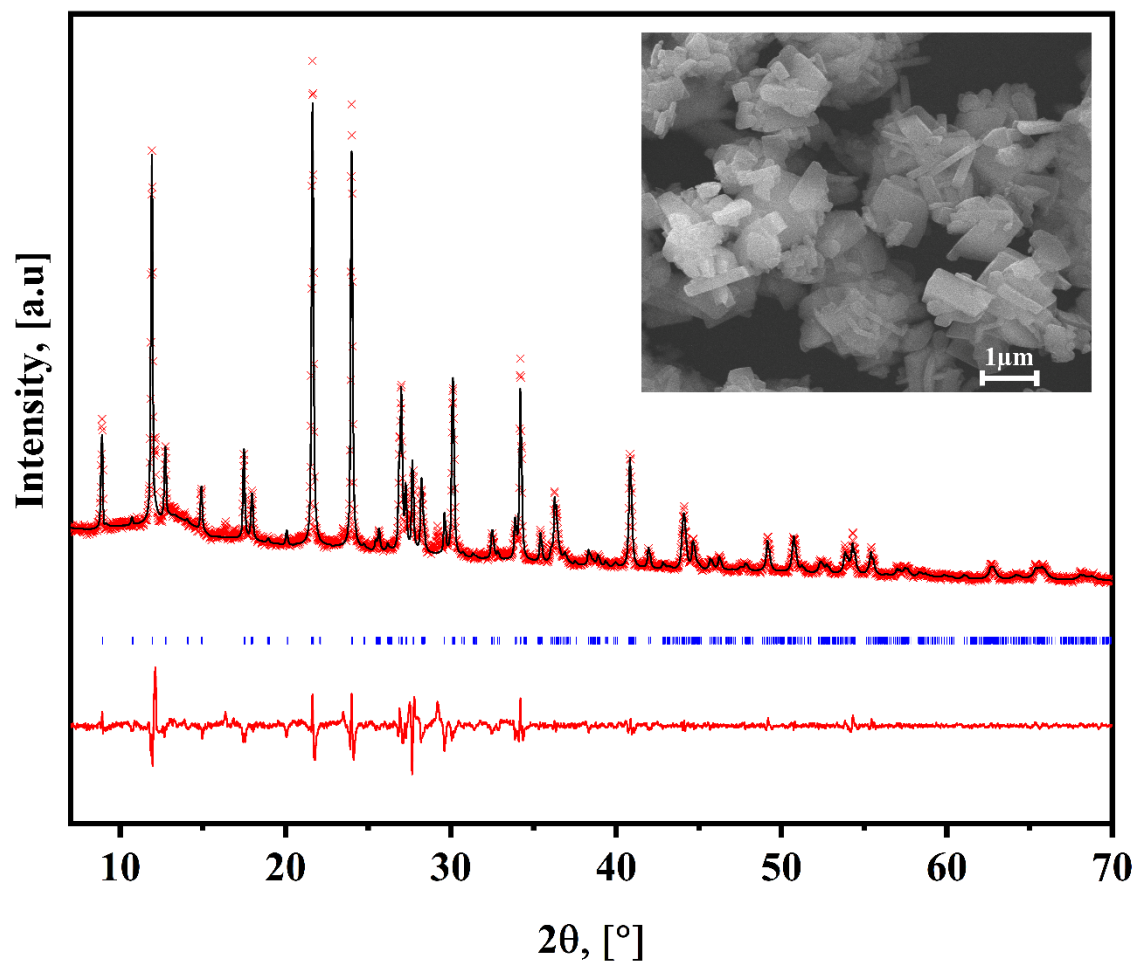

Figure S7. Experimental and fitted XRD powder patterns and their difference for  $\text{Fe}(\text{4IPy})_2[\text{Fe}(\text{CN})_5\text{NO}]$ . Inset: Morphology for the crystallites of the obtained solid.

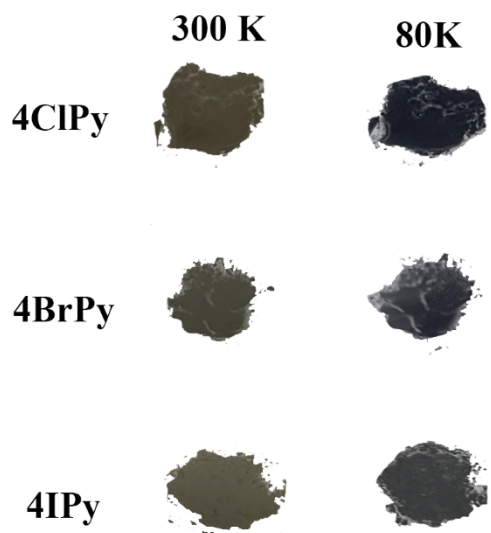

Figure S8. Color change for the  $\text{Fe}(\text{4XPy})_2[\text{Fe}(\text{CN})_5\text{NO}]$  series with  $\text{X} = \text{Cl}, \text{Br}, \text{I}$ .

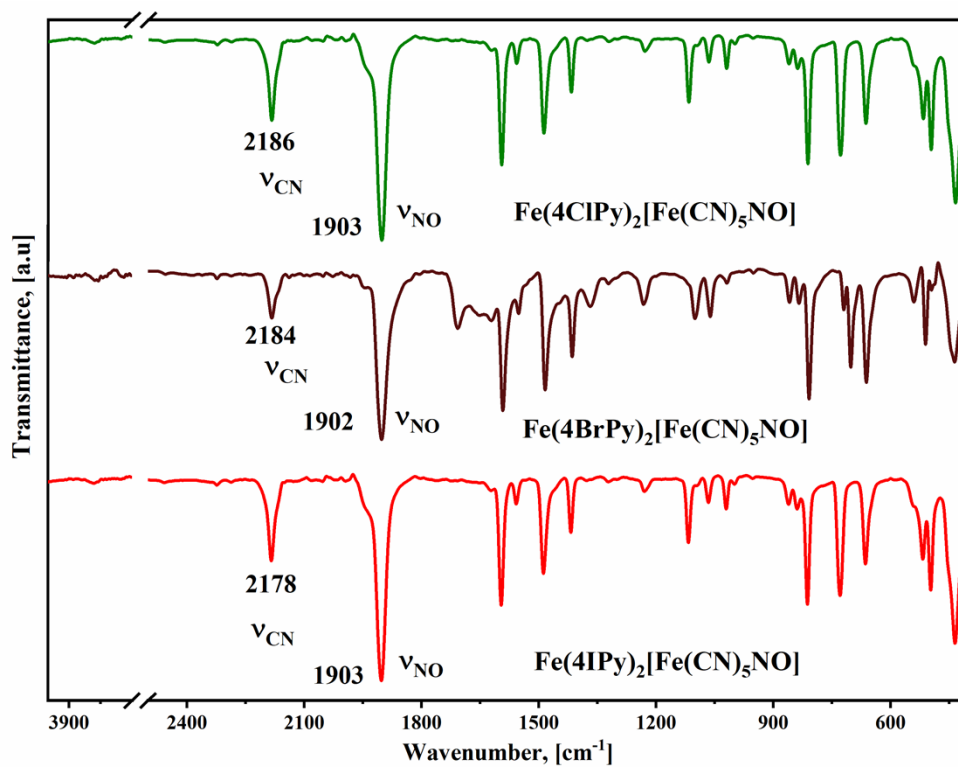

Figure S9. IR spectra at 80 K for the  $\text{Fe}(\text{4XPy})_2[\text{Fe}(\text{CN})_5\text{NO}]$  series with  $\text{X} = \text{Cl}, \text{Br}, \text{I}$ .



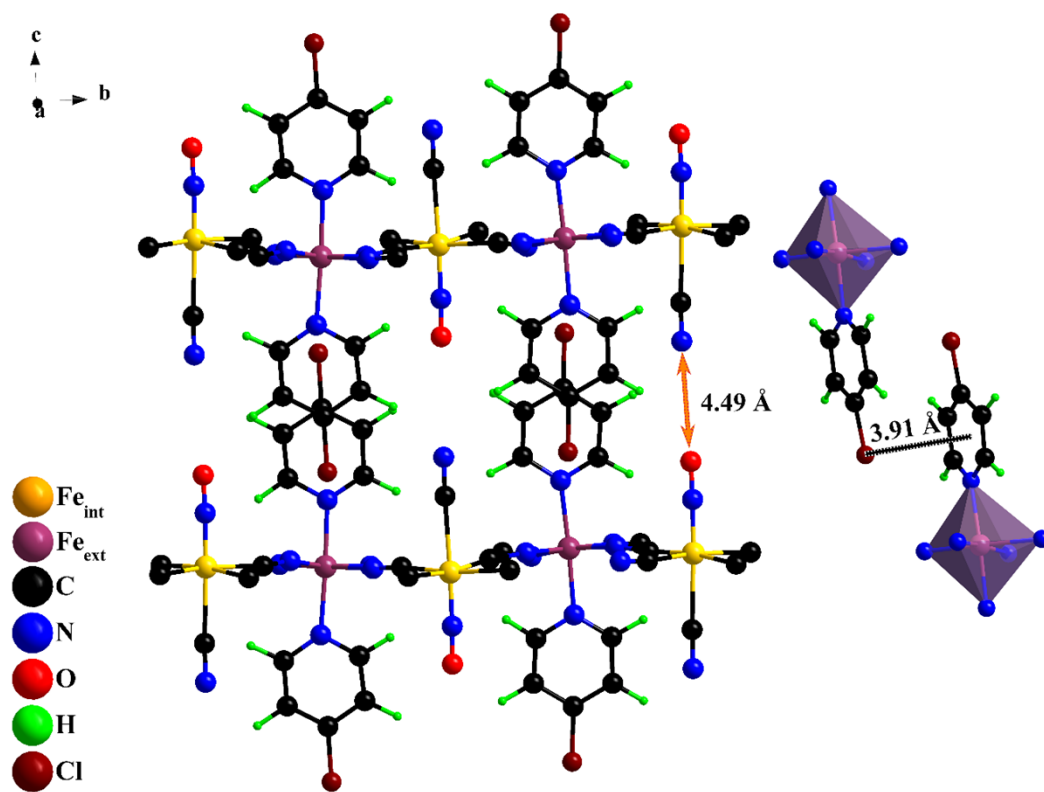

Figure S10. Calculated structure for the LS phase of  $\text{Fe}(\text{4ClPy})_2[\text{Fe}(\text{CN})_5\text{NO}]$ .

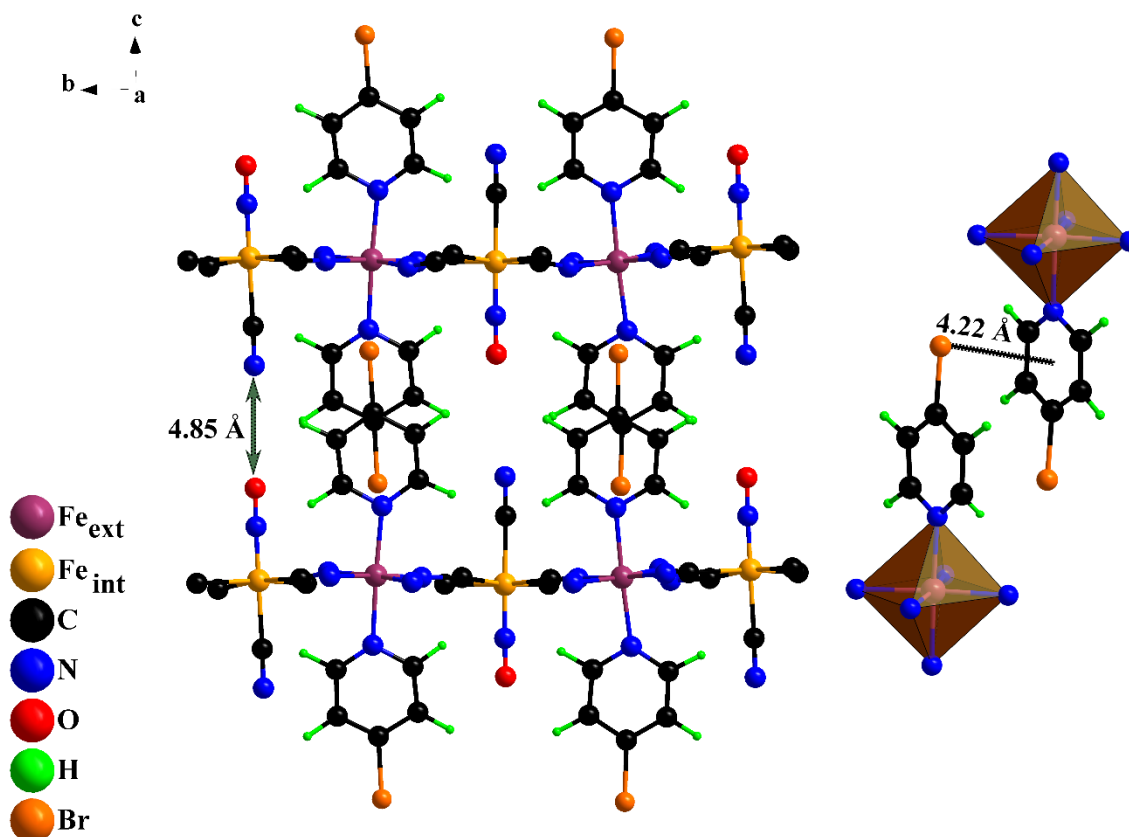

Figure S11. Calculated structure for the LS phase of  $\text{Fe}(\text{4BrPy})_2[\text{Fe}(\text{CN})_5\text{NO}]$ .

Table S1: Chemical analysis results for the obtained polycrystalline materials

| Sample | %Fe   |       | %X    |       | %C    |       | %N    |       | %O   |      | %H   |      |
|--------|-------|-------|-------|-------|-------|-------|-------|-------|------|------|------|------|
|        | Cal.  | Exp.  | Cal.  | Exp.  | Cal.  | Exp.  | Cal.  | Exp.  | Cal. | Exp. | Cal. | Exp. |
| 4ClPy  | 22.39 | 21.89 | 14.20 | 13.56 | 36.11 | 36.78 | 22.46 | 21.78 | 3.21 | 3.98 | 1.62 | 1.60 |
| 4BrPy  | 19.00 | 20.98 | 27.19 | 27.01 | 30.65 | 29.94 | 19.06 | 19.89 | 2.72 | 2.87 | 1.37 | 1.22 |
| 4IPy   | 16.38 | 15.01 | 37.22 | 38.56 | 26.42 | 27.97 | 16.43 | 15.00 | 2.34 | 2.56 | 1.18 | 1.20 |

Table S2: Details of data collection, crystal data, and structure refinement for  $\text{Fe}(\text{4XPy})_2[\text{Fe}(\text{CN})_5\text{NO}]$  series with X = Cl, Br and I at 300 K and 0K (calculated).

|                          | $\text{Fe}(\text{4BrPy})_2[\text{Fe}(\text{CN})_5\text{NO}]$ | $\text{Fe}(\text{4ClPy})_2[\text{Fe}(\text{CN})_5\text{NO}]$ | $\text{Fe}(\text{4IPy})_2[\text{Fe}(\text{CN})_5\text{NO}]$ |
|--------------------------|--------------------------------------------------------------|--------------------------------------------------------------|-------------------------------------------------------------|
| <b>Data collection</b>   |                                                              |                                                              |                                                             |
| <b>Diffractometer</b>    | D8 Advance (from Bruker)                                     |                                                              |                                                             |
| <b>Detector</b>          | lynx eye                                                     |                                                              |                                                             |
| <b>Wavelength (Å)</b>    | $\text{CuK}_\alpha$ : 1.54183                                |                                                              |                                                             |
| <b>2θ range (°)</b>      | 6.0-70.0                                                     | 6.0-60.0                                                     | 6.0-70.0                                                    |
| <b>Step size (°)</b>     | 0.00908                                                      | 0.01967                                                      | 0.01967                                                     |
| <b>Time per step (s)</b> | 0.01                                                         | 0.01                                                         | 0.01                                                        |

|                                |                                                         |                                                         |                                                        |
|--------------------------------|---------------------------------------------------------|---------------------------------------------------------|--------------------------------------------------------|
| <b>Unit cell</b>               |                                                         |                                                         |                                                        |
| <b>Space Group</b>             | P2 <sub>1</sub>                                         | P2 <sub>1</sub>                                         | P2 <sub>1</sub>                                        |
| <b>Cell Parameter</b>          | a= 7.3553(4)Å                                           | a= 7.3377(5)Å                                           | a= 7.3881(7)Å                                          |
|                                | b= 14.8367(6)Å                                          | b= 14.8736(7)Å                                          | b= 14.7798(6)Å                                         |
|                                | c= 10.3066(5)Å                                          | c= 10.2039(5)Å                                          | c= 10.5338(7)Å                                         |
|                                | β= 110.81(5)°                                           | β= 110.55(3)°                                           | β= 110.40(5)°                                          |
| <b>V(Å<sup>3</sup>)</b>        | 1051.4(2)                                               | 1042.8(2)                                               | 1078.1(2)                                              |
| <b>Z</b>                       | 2                                                       | 2                                                       | 2                                                      |
| <b>Refinement</b>              |                                                         |                                                         |                                                        |
| <b># of reflections</b>        | 487                                                     | 325                                                     | 502                                                    |
| <b># of refined parameters</b> |                                                         |                                                         |                                                        |
| <b>Structural</b>              | 120                                                     | 120                                                     | 120                                                    |
| <b>Profile</b>                 | 38                                                      | 38                                                      | 38                                                     |
| <b>R<sub>exp</sub></b>         | 2.34                                                    | 2.26                                                    | 3.40                                                   |
| <b>R<sub>wp</sub></b>          | 4.86                                                    | 4.82                                                    | 9.58                                                   |
| <b>R<sub>B</sub></b>           | 3.10                                                    | 2.86                                                    | 7.56                                                   |
| <b>S</b>                       | 2.07                                                    | 2.13                                                    | 2.82                                                   |
|                                | <b>Fe(4BrPy)<sub>2</sub>[Fe(CN)5NO]-<br/>calculated</b> | <b>Fe(4ClPy)<sub>2</sub>[Fe(CN)5NO]-<br/>calculated</b> | <b>Fe(4IPy)<sub>2</sub>[Fe(CN)5NO]-<br/>calculated</b> |
| <b>Unit cell</b>               |                                                         |                                                         |                                                        |
| <b>Space Group</b>             | P2 <sub>1</sub>                                         | P2 <sub>1</sub>                                         | P2 <sub>1</sub>                                        |
| <b>Cell Parameter</b>          | a= 7.3036Å                                              | a= 7.0979Å                                              | a= 7.2880Å                                             |
|                                | b= 14.7619Å                                             | b= 14.7517Å                                             | b= 14.5611Å                                            |
|                                | c= 10.2385Å                                             | c= 10.1774Å                                             | c= 10.6696Å                                            |
|                                | β= 110.57°                                              | β= 107.80°                                              | β= 110.06°                                             |
| <b>V(Å<sup>3</sup>)</b>        | 1033.5                                                  | 1014.6                                                  | 1063.5                                                 |
| <b>Z</b>                       | 2                                                       | 2                                                       | 2                                                      |

Table S3. Refined atomic positions and thermal (Biso) and occupation (Occ) factors for the materials under study.

| Composition | site | x                                               | y      | z       | Biso | Occ | x                                                              | y      | z       |  |
|-------------|------|-------------------------------------------------|--------|---------|------|-----|----------------------------------------------------------------|--------|---------|--|
|             |      | Fe(4BrPy) <sub>2</sub> [Fe(CN) <sub>5</sub> NO] |        |         |      |     | Fe(4BrPy) <sub>2</sub> [Fe(CN) <sub>5</sub> NO]-<br>calculated |        |         |  |
| Fee         | 2a   | 0.0262                                          | 0.6443 | 0.0284  | 2.04 | 1   | -0.0006                                                        | 0.6323 | 0.0111  |  |
| Fei         | 2a   | 0.5002                                          | 0.8968 | 0.0117  | 2.15 | 1   | 0.4867                                                         | 0.8759 | 0.0140  |  |
| C1          | 2a   | 0.3085                                          | 0.8081 | 0.0144  | 3.83 | 1   | 0.2851                                                         | 0.7882 | 0.0125  |  |
| N1          | 2a   | 0.2021                                          | 0.7541 | 0.0195  | 3.83 | 1   | 0.1856                                                         | 0.7305 | 0.0290  |  |
| C2          | 2a   | 0.6721                                          | 0.7989 | 0.0126  | 3.83 | 1   | 0.6582                                                         | 0.7807 | 0.0057  |  |
| N2          | 2a   | 0.7713                                          | 0.7429 | 0.0028  | 3.83 | 1   | 0.7721                                                         | 0.7242 | 0.0066  |  |
| C3          | 2a   | 0.6972                                          | 0.9820 | 0.0109  | 3.83 | 1   | 0.6735                                                         | 0.9607 | -0.0060 |  |
| N3          | 2a   | 0.8107                                          | 1.0302 | 0.0000  | 3.83 | 1   | 0.7850                                                         | 1.0416 | -0.0069 |  |
| C4          | 2a   | 0.3346                                          | 0.9980 | 0.0126  | 3.83 | 1   | 0.3167                                                         | 0.9996 | 0.0056  |  |
| N4          | 2a   | 0.2439                                          | 1.0590 | 0.0166  | 3.83 | 1   | 0.2149                                                         | 1.0572 | 0.0171  |  |
| C5          | 2a   | 0.4143                                          | 0.8957 | -0.1870 | 3.83 | 1   | 0.3909                                                         | 0.8712 | -0.2001 |  |
| N5          | 2a   | 0.3633                                          | 0.8950 | -0.3055 | 3.83 | 1   | 0.3429                                                         | 0.8707 | -0.3227 |  |
| N           | 2a   | 0.5780                                          | 0.8977 | 0.1807  | 3.83 | 1   | 0.5598                                                         | 0.8785 | 0.1827  |  |
| O           | 2a   | 0.6243                                          | 0.8985 | 0.2993  | 3.83 | 1   | 0.6046                                                         | 0.8786 | 0.3026  |  |
| N7          | 2a   | -0.0465                                         | 0.6604 | -0.1929 | 3.83 | 1   | -0.0926                                                        | 0.6420 | -0.2066 |  |
| C7          | 2a   | -0.1057                                         | 0.7347 | -0.2738 | 3.83 | 1   | -0.1397                                                        | 0.7175 | -0.2806 |  |
| C8          | 2a   | -0.1864                                         | 0.7332 | -0.4194 | 3.83 | 1   | -0.2160                                                        | 0.7169 | -0.4270 |  |
| C9          | 2a   | -0.2075                                         | 0.6499 | -0.4863 | 3.83 | 1   | -0.2370                                                        | 0.6344 | -0.4925 |  |
| C10         | 2a   | -0.1483                                         | 0.5718 | -0.4066 | 3.83 | 1   | -0.1843                                                        | 0.5533 | -0.4193 |  |
| C11         | 2a   | -0.0694                                         | 0.5806 | -0.2616 | 3.83 | 1   | -0.1065                                                        | 0.5614 | -0.2759 |  |
| Br1         | 2a   | -0.3148                                         | 0.6430 | -0.6819 | 3.65 | 1   | -0.3545                                                        | 0.6300 | -0.6896 |  |
| N8          | 2a   | 0.0989                                          | 0.6282 | 0.2497  | 3.83 | 1   | 0.0953                                                         | 0.6167 | 0.2282  |  |
| C12         | 2a   | 0.1581                                          | 0.5539 | 0.3306  | 3.83 | 1   | 0.1444                                                         | 0.5420 | 0.3087  |  |
| C13         | 2a   | 0.2388                                          | 0.5554 | 0.4762  | 3.83 | 1   | 0.2237                                                         | 0.5476 | 0.4520  |  |
| C14         | 2a   | 0.2599                                          | 0.6387 | 0.5431  | 3.83 | 1   | 0.2407                                                         | 0.6304 | 0.5208  |  |
| C15         | 2a   | 0.2007                                          | 0.7168 | 0.4634  | 3.83 | 1   | 0.1774                                                         | 0.7063 | 0.4401  |  |
| C16         | 2a   | 0.1218                                          | 0.7080 | 0.3184  | 3.83 | 1   | 0.1106                                                         | 0.6965 | 0.2972  |  |
| Br2         | 2a   | 0.3672                                          | 0.6456 | 0.7387  | 3.65 | 1   | 0.3573                                                         | 0.6363 | 0.7152  |  |

Table S4. Refined atomic positions and thermal (Biso) and occupation (Occ) factors for the materials under study.

| Composition | site | x                                               | y      | z       | Biso | Occ | x                                                              | y      | z       |  |
|-------------|------|-------------------------------------------------|--------|---------|------|-----|----------------------------------------------------------------|--------|---------|--|
|             |      | Fe(4ClPy) <sub>2</sub> [Fe(CN) <sub>5</sub> NO] |        |         |      |     | Fe(4ClPy) <sub>2</sub> [Fe(CN) <sub>5</sub> NO]-<br>calculated |        |         |  |
| Fee         | 2a   | 0.0262                                          | 0.6443 | 0.0284  | 2.44 | 1   | 0.0062                                                         | 0.6320 | 0.0178  |  |
| Fei         | 2a   | 0.5002                                          | 0.8968 | 0.0117  | 2.85 | 1   | 0.4898                                                         | 0.8804 | 0.0177  |  |
| C1          | 2a   | 0.3085                                          | 0.8081 | 0.0144  | 4.02 | 1   | 0.2874                                                         | 0.7916 | 0.0162  |  |
| N1          | 2a   | 0.2021                                          | 0.7541 | 0.0195  | 4.02 | 1   | 0.1998                                                         | 0.7266 | 0.0304  |  |
| C2          | 2a   | 0.6721                                          | 0.7989 | 0.0126  | 4.02 | 1   | 0.6589                                                         | 0.7834 | 0.0073  |  |
| N2          | 2a   | 0.7713                                          | 0.7429 | 0.0028  | 4.02 | 1   | 0.7769                                                         | 0.7264 | 0.0152  |  |
| C3          | 2a   | 0.6972                                          | 0.9820 | 0.0109  | 4.02 | 1   | 0.6796                                                         | 0.9648 | -0.0081 |  |
| N3          | 2a   | 0.8107                                          | 1.0302 | 0.0000  | 4.02 | 1   | 0.7929                                                         | 1.0410 | -0.0184 |  |
| C4          | 2a   | 0.3346                                          | 0.9980 | 0.0126  | 4.02 | 1   | 0.3151                                                         | 0.9999 | 0.0067  |  |
| N4          | 2a   | 0.2439                                          | 1.0590 | 0.0166  | 4.02 | 1   | 0.2057                                                         | 1.0572 | 0.0145  |  |
| C5          | 2a   | 0.4143                                          | 0.8957 | -0.1870 | 4.02 | 1   | 0.3864                                                         | 0.8737 | -0.2205 |  |
| N5          | 2a   | 0.3633                                          | 0.8950 | -0.3055 | 4.02 | 1   | 0.3506                                                         | 0.8735 | -0.3413 |  |
| N           | 2a   | 0.5780                                          | 0.8977 | 0.1807  | 4.02 | 1   | 0.5614                                                         | 0.8818 | 0.1863  |  |
| O           | 2a   | 0.6243                                          | 0.8985 | 0.2993  | 4.02 | 1   | 0.6023                                                         | 0.8801 | 0.3045  |  |
| N7          | 2a   | -0.0465                                         | 0.6604 | -0.1929 | 4.02 | 1   | -0.0810                                                        | 0.6391 | -0.1905 |  |
| C7          | 2a   | -0.1057                                         | 0.7347 | -0.2738 | 4.02 | 1   | -0.1252                                                        | 0.7150 | -0.2639 |  |
| C8          | 2a   | -0.1864                                         | 0.7332 | -0.4194 | 4.02 | 1   | -0.2023                                                        | 0.7148 | -0.4091 |  |
| C9          | 2a   | -0.2075                                         | 0.6499 | -0.4863 | 4.02 | 1   | -0.2235                                                        | 0.6327 | -0.4773 |  |
| C10         | 2a   | -0.1483                                         | 0.5718 | -0.4066 | 4.02 | 1   | -0.1702                                                        | 0.5522 | -0.4006 |  |
| C11         | 2a   | -0.0694                                         | 0.5806 | -0.2616 | 4.02 | 1   | -0.0968                                                        | 0.5595 | -0.2601 |  |
| Cl1         | 2a   | -0.3065                                         | 0.6435 | -0.6668 | 3.24 | 1   | -0.3314                                                        | 0.6280 | -0.6523 |  |
| N8          | 2a   | 0.0989                                          | 0.6282 | 0.2497  | 4.02 | 1   | 0.1025                                                         | 0.6186 | 0.2312  |  |
| C12         | 2a   | 0.1581                                          | 0.5539 | 0.3306  | 4.02 | 1   | 0.1496                                                         | 0.5416 | 0.3096  |  |
| C13         | 2a   | 0.2388                                          | 0.5554 | 0.4762  | 4.02 | 1   | 0.2250                                                         | 0.5465 | 0.4517  |  |
| C14         | 2a   | 0.2599                                          | 0.6387 | 0.5431  | 4.02 | 1   | 0.2450                                                         | 0.6287 | 0.5188  |  |

|     |    |        |        |        |      |   |        |        |        |
|-----|----|--------|--------|--------|------|---|--------|--------|--------|
| C15 | 2a | 0.2007 | 0.7168 | 0.4634 | 4.02 | 1 | 0.1812 | 0.7055 | 0.4402 |
| C16 | 2a | 0.1218 | 0.7080 | 0.3184 | 4.02 | 1 | 0.1173 | 0.6966 | 0.2997 |
| Cl2 | 2a | 0.3589 | 0.6451 | 0.7236 | 3.24 | 1 | 0.3478 | 0.6337 | 0.6940 |

Table S5. Refined atomic positions and thermal (Biso) and occupation (Occ) factors for the materials under study.

| Composition | site | x                                              | y      | z      | Biso | Occ | x                                                             | y      | z      |
|-------------|------|------------------------------------------------|--------|--------|------|-----|---------------------------------------------------------------|--------|--------|
|             |      | Fe(4IPy) <sub>2</sub> [Fe(CN) <sub>5</sub> NO] |        |        |      |     | Fe(4IPy) <sub>2</sub> [Fe(CN) <sub>5</sub> NO]-<br>calculated |        |        |
| Fee         | 2a   | 0.4953                                         | 0.1360 | 0.9835 | 2.39 | 1   | 0.4847                                                        | 0.1319 | 0.9842 |
| Fei         | 2a   | 0.9981                                         | 0.3789 | 1.0000 | 2.87 | 1   | 0.9983                                                        | 0.3781 | 1.0013 |
| C1          | 2a   | 0.8055                                         | 0.2887 | 0.9846 | 4.15 | 1   | 0.7851                                                        | 0.2886 | 0.9750 |
| N1          | 2a   | 0.6820                                         | 0.2408 | 0.9733 | 4.15 | 1   | 0.6831                                                        | 0.2298 | 0.9864 |
| C2          | 2a   | 1.1755                                         | 0.2879 | 0.9838 | 4.15 | 1   | 1.1756                                                        | 0.2807 | 0.9857 |
| N2          | 2a   | 1.2865                                         | 0.2365 | 0.9795 | 4.15 | 1   | 1.2900                                                        | 0.2236 | 0.9859 |
| C3          | 2a   | 1.1902                                         | 0.4693 | 1.0091 | 4.15 | 1   | 1.1900                                                        | 0.4718 | 1.0086 |
| N3          | 2a   | 1.3031                                         | 0.5209 | 1.0098 | 4.15 | 1   | 1.3046                                                        | 0.5299 | 1.0170 |
| C4          | 2a   | 0.8202                                         | 0.4668 | 1.0127 | 4.15 | 1   | 0.8023                                                        | 0.4718 | 1.0097 |
| N4          | 2a   | 0.7140                                         | 0.5192 | 1.0202 | 4.15 | 1   | 0.6997                                                        | 0.5304 | 1.0211 |
| C5          | 2a   | 0.8998                                         | 0.3956 | 0.8076 | 4.15 | 1   | 0.8837                                                        | 0.3903 | 0.8084 |
| N5          | 2a   | 0.8300                                         | 0.4086 | 0.6954 | 4.15 | 1   | 0.8284                                                        | 0.4049 | 0.6932 |
| N           | 2a   | 1.0765                                         | 0.3618 | 1.1604 | 4.15 | 1   | 1.0778                                                        | 0.3632 | 1.1645 |
| O           | 2a   | 1.1302                                         | 0.3467 | 1.2722 | 4.15 | 1   | 1.1371                                                        | 0.3442 | 1.2765 |
| N7          | 2a   | 0.3963                                         | 0.1663 | 0.7646 | 4.15 | 1   | 0.3871                                                        | 0.1569 | 0.7695 |
| C7          | 2a   | 0.3562                                         | 0.2359 | 0.6762 | 4.15 | 1   | 0.3563                                                        | 0.2313 | 0.6900 |
| C8          | 2a   | 0.2826                                         | 0.2258 | 0.5370 | 4.15 | 1   | 0.2916                                                        | 0.2242 | 0.5509 |
| C9          | 2a   | 0.2479                                         | 0.1386 | 0.4851 | 4.15 | 1   | 0.2453                                                        | 0.1387 | 0.4919 |
| C10         | 2a   | 0.2874                                         | 0.0653 | 0.5728 | 4.15 | 1   | 0.2847                                                        | 0.0623 | 0.5766 |
| C11         | 2a   | 0.3607                                         | 0.0826 | 0.7105 | 4.15 | 1   | 0.3552                                                        | 0.0739 | 0.7132 |
| I1          | 2a   | 0.1380                                         | 0.1181 | 0.2775 | 3.52 | 1   | 0.1345                                                        | 0.1244 | 0.2855 |
| N8          | 2a   | 0.5943                                         | 0.1057 | 1.2024 | 4.15 | 1   | 0.5874                                                        | 0.1086 | 1.2001 |
| C12         | 2a   | 0.6344                                         | 0.0361 | 1.2908 | 4.15 | 1   | 0.6206                                                        | 0.0345 | 1.2829 |
| C13         | 2a   | 0.7080                                         | 0.0462 | 1.4300 | 4.15 | 1   | 0.6912                                                        | 0.0428 | 1.4241 |
| C14         | 2a   | 0.7427                                         | 0.1334 | 1.4819 | 4.15 | 1   | 0.7306                                                        | 0.1317 | 1.4778 |
| C15         | 2a   | 0.7032                                         | 0.2067 | 1.3942 | 4.15 | 1   | 0.6968                                                        | 0.2075 | 1.3939 |
| C16         | 2a   | 0.6299                                         | 0.1894 | 1.2565 | 4.15 | 1   | 0.6206                                                        | 0.1917 | 1.2583 |
| I2          | 2a   | 0.8526                                         | 0.1539 | 1.6895 | 3.52 | 1   | 0.8431                                                        | 0.1461 | 1.6854 |

Table S6. Calculated inter-atomic distances (in Å) and bond angles (in °) for the materials under study a) Fe(4BrPy)<sub>2</sub>[Fe(CN)<sub>5</sub>NO], b) Fe(4BrPy)<sub>2</sub>[Fe(CN)<sub>5</sub>NO]-calculated.

| Bond distance (Å) |       |       |            |        |        |             |        |        |
|-------------------|-------|-------|------------|--------|--------|-------------|--------|--------|
| Bond distance (Å) | a)    | b)    | Angles (°) | a)     | b)     | Angles (°)  | a)     | b)     |
| Fee-N1            | 2.102 | 1.952 | N1-Fee-N2  | 89.51  | 92.35  | N1-C1-Fei   | 177.23 | 169.93 |
| Fee-N2            | 2.318 | 2.132 | N1-Fee-N3  | 102.82 | 88.42  | N2-C2-Fei   | 174.69 | 176.28 |
| Fee-N3            | 2.154 | 2.079 | N1-Fee-N4  | 159.15 | 168.51 | N3-C3-Fei   | 174.62 | 164.52 |
| Fee-N4            | 2.260 | 1.856 | N1-Fee-N7  | 78.11  | 90.09  | N4-C4-Fei   | 177.28 | 168.15 |
| Fee-N7            | 2.163 | 2.095 | N1-Fee-N8  | 101.89 | 91.14  | N5-C5-Fei   | 179.91 | 177.10 |
| Fee-N8            | 2.163 | 2.095 | N2-Fee-N3  | 161.34 | 177.66 | O-N-Fei     | 176.95 | 177.11 |
| Fei-C1            | 1.936 | 1.957 | N2-Fee-N4  | 73.36  | 76.64  | C1-N1-Fei   | 174.15 | 167.15 |
| Fei-C2            | 1.924 | 1.904 | N2-Fee-N7  | 85.60  | 88.70  | C2-N2-Fei   | 166.53 | 174.30 |
| Fei-C3            | 1.925 | 1.915 | N2-Fee-N8  | 94.40  | 93.46  | C3-N3-Fei   | 166.80 | 164.48 |
| Fei-C4            | 1.935 | 2.193 | N3-Fee-N4  | 91.34  | 102.45 | C4-N4-Fei   | 157.69 | 162.87 |
| Fei-C5            | 1.917 | 2.055 | N3-Fee-N7  | 83.37  | 89.09  | Fee-N7-C7   | 129.99 | 126.05 |
| Fei-N             | 1.629 | 1.619 | N3-Fee-N8  | 96.63  | 88.73  | N7-C7-C8    | 124.42 | 122.13 |
| C1-N1             | 1.134 | 1.170 | N4-Fee-N7  | 88.59  | 86.42  | C7-C8-C9    | 118.18 | 117.49 |
| C2-N2             | 1.134 | 1.176 | N4-Fee-N8  | 91.41  | 92.79  | C8-C9-C10   | 119.12 | 122.50 |
| C3-N3             | 1.135 | 1.447 | N7-Fee-N8  | 180.0  | 177.47 | C9-C10-C11  | 118.25 | 115.49 |
| C4-N4             | 1.134 | 1.162 | N-Fei-C1   | 88.35  | 89.38  | C10-C11-N7  | 124.30 | 123.61 |
| C5-N5             | 1.143 | 1.179 | N-Fei-C2   | 91.17  | 95.14  | C11-N7-Fei  | 113.06 | 115.42 |
| N-O               | 1.146 | 1.154 | N-Fei-C3   | 91.15  | 96.79  | C11-N7-C7   | 115.73 | 118.53 |
| N7-C7             | 1.357 | 1.323 | N-Fei-C4   | 88.35  | 89.54  | C8-C9-Br1   | 120.39 | 118.78 |
| C7-C8             | 1.404 | 1.404 | N-Fei-C5   | 178.77 | 179.16 | C10-C9-Br1  | 120.48 | 118.64 |
| C8-C9             | 1.397 | 1.373 | C5-Fei-C1  | 92.53  | 89.77  | Fee-N8-C12  | 129.99 | 131.04 |
| C9-C10            | 1.397 | 1.393 | C5-Fei-C2  | 88.02  | 84.85  | N8-C12-C13  | 124.42 | 121.61 |
| C10-C11           | 1.404 | 1.381 | C5-Fei-C3  | 87.94  | 84.05  | C12-C13-C14 | 118.18 | 121.34 |
| C11-N7            | 1.359 | 1.371 | C5-Fei-C4  | 92.44  | 90.60  | C13-C14-C15 | 119.12 | 117.40 |
| C9-Br1            | 1.889 | 1.896 | C1-Fei-C2  | 88.14  | 90.93  | C14-C15-C16 | 118.25 | 118.19 |
| N8-C12            | 1.357 | 1.348 | C1-Fei-C3  | 178.14 | 173.82 | C15-C16-N8  | 124.30 | 125.26 |
| C12-C13           | 1.404 | 1.378 | C1-Fei-C4  | 93.70  | 97.85  | C16-N8-Fei  | 113.06 | 113.10 |
| C13-C14           | 1.397 | 1.394 | C3-Fei-C2  | 90.08  | 88.46  | C16-N8-C12  | 115.73 | 115.85 |
| C14-C15           | 1.397 | 1.372 | C3-Fei-C4  | 88.08  | 82.32  | C13-C14-Br2 | 120.39 | 120.30 |
| C15-C16           | 1.404 | 1.378 | C2-Fei-C4  | 178.09 | 170.10 | C15-C14-Br2 | 120.48 | 122.24 |
| C16-N8            | 1.359 | 1.358 |            |        |        |             |        |        |
| C14-Br2           | 1.889 | 1.872 |            |        |        |             |        |        |

Table S7. Calculated inter-atomic distances (in Å) and bond angles (in °) for the materials under study a) Fe(4ClPy)<sub>2</sub>[Fe(CN)<sub>5</sub>NO], b) Fe(4ClPy)<sub>2</sub>[Fe(CN)<sub>5</sub>NO]-calculated.

| Bond distance (Å) | a)    |       | Angles (°) | a)     |        | Angles (°)  | a)     |        |
|-------------------|-------|-------|------------|--------|--------|-------------|--------|--------|
|                   | a)    | b)    |            | a)     | b)     |             | a)     | b)     |
| Fee-N1            | 2.103 | 1.935 | N1-Fee-N2  | 89.25  | 93.07  | N1-C1-Fei   | 177.24 | 165.39 |
| Fee-N2            | 2.318 | 2.136 | N1-Fee-N3  | 103.15 | 89.57  | N2-C2-Fei   | 174.74 | 172.45 |
| Fee-N3            | 2.154 | 1.957 | N1-Fee-N4  | 159.17 | 169.77 | N3-C3-Fei   | 174.66 | 167.33 |
| Fee-N4            | 2.260 | 1.813 | N1-Fee-N7  | 78.31  | 90.90  | N4-C4-Fei   | 177.28 | 168.80 |
| Fee-N7            | 2.144 | 2.021 | N1-Fee-N8  | 101.69 | 89.96  | N5-C5-Fei   | 179.91 | 173.80 |
| Fee-N8            | 2.144 | 2.077 | N2-Fee-N3  | 161.38 | 177.33 | O-N-Fei     | 176.93 | 176.16 |
| Fei-C1            | 1.936 | 1.941 | N2-Fee-N4  | 73.56  | 78.92  | C1-N1-Fei   | 174.15 | 166.34 |
| Fei-C2            | 1.924 | 1.891 | N2-Fee-N7  | 85.30  | 88.02  | C2-N2-Fei   | 166.57 | 173.90 |
| Fei-C3            | 1.924 | 1.911 | N2-Fee-N8  | 94.70  | 94.64  | C3-N3-Fei   | 166.78 | 169.10 |
| Fei-C4            | 1.936 | 2.138 | N3-Fee-N4  | 91.11  | 98.42  | C4-N4-Fei   | 157.70 | 164.00 |
| Fei-C5            | 1.900 | 2.310 | N3-Fee-N7  | 83.73  | 91.60  | Fee-N7-C7   | 129.81 | 125.24 |
| Fei-N             | 1.615 | 1.634 | N3-Fee-N8  | 96.27  | 85.70  | N7-C7-C8    | 124.16 | 122.44 |
| C1-N1             | 1.134 | 1.175 | N4-Fee-N7  | 88.42  | 82.55  | C7-C8-C9    | 117.91 | 118.44 |
| C2-N2             | 1.133 | 1.172 | N4-Fee-N8  | 91.58  | 96.96  | C8-C9-C10   | 119.65 | 119.44 |
| C3-N3             | 1.134 | 1.405 | N7-Fee-N8  | 180.0  | 177.16 | C9-C10-C11  | 117.94 | 117.71 |
| C4-N4             | 1.134 | 1.167 | N-Fei-C1   | 88.67  | 90.49  | C10-C11-N7  | 124.07 | 123.88 |
| C5-N5             | 1.133 | 1.177 | N-Fei-C2   | 90.90  | 93.98  | C11-N7-Fei  | 112.70 | 116.88 |
| N-O               | 1.136 | 1.148 | N-Fei-C3   | 90.83  | 97.48  | C11-N7-C7   | 116.27 | 117.87 |
| N7-C7             | 1.356 | 1.329 | N-Fei-C4   | 88.61  | 91.93  | C8-C9-C11   | 120.16 | 120.25 |
| C7-C8             | 1.393 | 1.410 | N-Fei-C5   | 178.77 | 178.23 | C10-C9-C11  | 120.19 | 120.11 |
| C8-C9             | 1.397 | 1.381 | C5-Fei-C1  | 92.22  | 88.05  | Fee-N8-C12  | 129.81 | 129.18 |
| C9-C10            | 1.397 | 1.408 | C5-Fei-C2  | 88.28  | 84.97  | N8-C12-C13  | 124.16 | 120.91 |
| C10-C11           | 1.393 | 1.368 | C5-Fei-C3  | 88.25  | 83.96  | C12-C13-C14 | 117.91 | 120.87 |
| C11-N7            | 1.359 | 1.358 | C5-Fei-C4  | 92.18  | 89.27  | C13-C14-C15 | 119.65 | 117.98 |
| C9-C11            | 1.729 | 1.711 | C1-Fei-C2  | 87.86  | 88.27  | C14-C15-C16 | 117.94 | 118.16 |
| N8-C12            | 1.356 | 1.369 | C1-Fei-C3  | 178.14 | 171.94 | C15-C16-N8  | 124.07 | 125.28 |
| C12-C13           | 1.393 | 1.382 | C1-Fei-C4  | 93.98  | 98.05  | C16-N8-Fei  | 112.70 | 114.38 |
| C13-C14           | 1.397 | 1.377 | C3-Fei-C2  | 90.36  | 89.95  | C16-N8-C12  | 116.27 | 116.43 |
| C14-C15           | 1.397 | 1.381 | C3-Fei-C4  | 87.80  | 82.97  | C13-C14-C12 | 120.16 | 120.10 |
| C15-C16           | 1.393 | 1.368 | C2-Fei-C4  | 178.09 | 171.31 | C15-C14-C12 | 120.19 | 121.91 |
| C16-N8            | 1.359 | 1.333 |            |        |        |             |        |        |
| C14-C12           | 1.729 | 1.709 |            |        |        |             |        |        |

Table S8. Calculated inter-atomic distances (in Å) and bond angles (in °) for the materials under study a) Fe(4IPy)<sub>2</sub>[Fe(CN)<sub>5</sub>NO], b) Fe(4IPy)<sub>2</sub>[Fe(CN)<sub>5</sub>NO]-calculated.

| Bond distance (Å) | a)    | b)    | Angles (°) | a)     | b)     | Angles (°)  | a)     | b)     |
|-------------------|-------|-------|------------|--------|--------|-------------|--------|--------|
| Fee-N1            | 2.102 | 2.025 | N1-Fee-N2  | 88.21  | 92.11  | N1-C1-Fei   | 174.71 | 165.55 |
| Fee-N2            | 2.131 | 1.953 | N1-Fee-N3  | 96.89  | 88.72  | N2-C2-Fei   | 176.59 | 175.11 |
| Fee-N3            | 2.246 | 2.139 | N1-Fee-N4  | 176.25 | 176.50 | N3-C3-Fei   | 177.27 | 177.49 |
| Fee-N4            | 2.309 | 1.985 | N1-Fee-N7  | 77.38  | 82.48  | N4-C4-Fei   | 179.95 | 174.77 |
| Fee-N7            | 2.208 | 2.184 | N1-Fee-N8  | 102.61 | 96.42  | N5-C5-Fei   | 174.73 | 173.10 |
| Fee-N8            | 2.208 | 2.191 | N2-Fee-N3  | 174.88 | 179.15 | O-N-Fei     | 177.61 | 173.48 |
| Fei-C1            | 1.915 | 1.973 | N2-Fee-N4  | 92.57  | 91.28  | C1-N1-Fee   | 168.08 | 173.19 |
| Fei-C2            | 1.927 | 1.964 | N2-Fee-N7  | 82.18  | 85.39  | C2-N2-Fee   | 176.25 | 178.09 |
| Fei-C3            | 1.927 | 1.935 | N2-Fee-N8  | 97.82  | 94.78  | C3-N3-Fee   | 173.13 | 174.91 |
| Fei-C4            | 1.886 | 1.999 | N3-Fee-N4  | 82.36  | 87.89  | C4-N4-Fee   | 173.33 | 172.80 |
| Fei-C5            | 1.916 | 1.946 | N3-Fee-N7  | 99.27  | 94.91  | Fee-N7-C7   | 142.03 | 135.97 |
| Fei-N             | 1.604 | 1.650 | N3-Fee-N8  | 80.73  | 84.94  | N7-C7-C8    | 124.06 | 122.12 |
| C1-N1             | 1.128 | 1.167 | N4-Fee-N7  | 99.08  | 96.92  | C7-C8-C9    | 117.91 | 119.35 |
| C2-N2             | 1.130 | 1.177 | N4-Fee-N8  | 80.92  | 84.17  | C8-C9-C10   | 119.71 | 117.22 |
| C3-N3             | 1.128 | 1.170 | N7-Fee-N8  | 180.0  | 178.89 | C9-C10-C11  | 117.93 | 120.29 |
| C4-N4             | 1.125 | 1.168 | N-Fei-C1   | 87.96  | 92.15  | C10-C11-N7  | 124.03 | 122.06 |
| C5-N5             | 1.129 | 1.174 | N-Fei-C2   | 88.64  | 89.51  | C11-N7-Fee  | 101.54 | 105.37 |
| N-O               | 1.126 | 1.156 | N-Fei-C3   | 93.87  | 93.61  | C11-N7-C7   | 116.36 | 118.66 |
| N7-C7             | 1.349 | 1.346 | N-Fei-C4   | 92.21  | 92.29  | C8-C9-I1    | 120.12 | 121.16 |
| C7-C8             | 1.383 | 1.398 | N-Fei-C5   | 178.09 | 175.01 | C10-C9-I1   | 120.17 | 121.55 |
| C8-C9             | 1.388 | 1.384 | C5-Fei-C1  | 90.20  | 83.02  | Fee-N8-C12  | 142.03 | 136.47 |
| C9-C10            | 1.387 | 1.399 | C5-Fei-C2  | 90.86  | 91.86  | N8-C12-C13  | 124.06 | 122.65 |
| C10-C11           | 1.384 | 1.379 | C5-Fei-C3  | 87.96  | 91.15  | C12-C13-C14 | 117.91 | 117.39 |
| C11-N7            | 1.349 | 1.334 | C5-Fei-C4  | 88.26  | 86.05  | C13-C14-C15 | 119.71 | 120.21 |
| C9-I1             | 2.073 | 2.080 | C1-Fei-C2  | 90.85  | 91.14  | C14-C15-C16 | 117.93 | 117.51 |
| N8-C12            | 1.349 | 1.362 | C1-Fei-C3  | 178.09 | 173.70 | C15-C16-N8  | 124.03 | 125.36 |
| C12-C13           | 1.383 | 1.420 | C1-Fei-C4  | 88.28  | 85.25  | C16-N8-Fee  | 101.54 | 106.79 |
| C13-C14           | 1.388 | 1.405 | C3-Fei-C2  | 88.65  | 91.47  | C16-N8-C12  | 116.36 | 116.73 |
| C14-C15           | 1.387 | 1.389 | C3-Fei-C4  | 92.19  | 91.95  | C13-C14-I2  | 120.12 | 118.37 |
| C15-C16           | 1.384 | 1.380 | C2-Fei-C4  | 178.76 | 176.02 | C15-C14-I2  | 120.17 | 121.41 |
| C16-N8            | 1.349 | 1.344 |            |        |        |             |        |        |
| C14-I2            | 2.073 | 2.092 |            |        |        |             |        |        |

Table S9. Relevant interatomic distances (in Å), distortion indexes  $\sum|90-\alpha_i|$  ( $\angle$ , in °), and CShM for the Fe(Py)<sub>2</sub>[Fe(CN)<sub>5</sub>NO], Fe(3FPy)<sub>2</sub>[Fe(CN)<sub>5</sub>NO], and Fe(3ClPy)<sub>2</sub>[Fe(CN)<sub>5</sub>NO].

| Ligand | Phase           | Fe-N <sub>L</sub>                     | Fe-N <sub>CN</sub>                                                             | $\sum 90-\alpha_i $ | $\sum 60-\theta_i $ | CShM |
|--------|-----------------|---------------------------------------|--------------------------------------------------------------------------------|---------------------|---------------------|------|
| Py     | HS (295 K), XRD | Fe1-N5: 2.335(14)<br>Fe1-N6:2.232(1)  | Fe1-N1: 2.134(8)<br>Fe1-N2: 2.134(8)<br>Fe1-N3: 2.161(16)<br>Fe1-N4: 2.149(24) | 35.52               | 49.53               | 0.33 |
|        | LS (50 K), XRD  | Fe1-N5: 2.252(11)<br>Fe1-N6:2.234(11) | Fe1-N1: 2.092(8)<br>Fe1-N2: 2.209(10)<br>Fe1-N3: 2.092(8)<br>Fe1-N4: 2.209(10) | 21.01               | 33.84               | 0.13 |
| 3FPy   | HS (295 K), XRD | Fe1-N6: 2.286(10)<br>Fe1-N5:2.404(15) | Fe1-N1: 2.403(15)<br>Fe1-N2: 2.110(20)<br>Fe1-N3:                              | 55.83               | 85.91               | 0.77 |



|       |                    |                                              |                                                                                                                                           |       |        |      |
|-------|--------------------|----------------------------------------------|-------------------------------------------------------------------------------------------------------------------------------------------|-------|--------|------|
|       | LS (100K ),<br>XRD | Fe1–N5:<br>2.284(11)<br>Fe1–<br>N6:2.393(15) | 2.202(16)<br>Fe1–N4:<br>2.149(24)<br><br>Fe1–N1:<br>2.399(25)<br>Fe1–N2:<br>2.208(20)<br>Fe1–N3:<br>2.199(10)<br>Fe1–N4:<br><br>2.146(12) | 49.19 | 71.15  | 0.69 |
| 3CIPy | HS (295 K),<br>XRD | Fee–N8:<br>2.406(46)<br>Fee–N7:<br>2.522(54) | Fee–N1:<br>2.200(32)<br>Fee–N2:<br>2.141(24)<br>Fee–N3:<br>2.391(44)<br>Fee–N4:<br>2.193(24)                                              | 72.25 | 124.20 | 1.24 |

CShM: continuous shape measure was calculated using Shape <sup>41</sup>software

Table S10. Mössbauer parameters ( $\delta$ ,  $\Delta_{QS}$ ,  $\Gamma$ ) at 5 and 295 K for the  $\text{Fe}(3\text{XPy})_2[\text{Fe}(\text{CN})_5\text{NO}]$  series, according to reference 18.

| Ligand | Temp (K) | $\delta^*$ , mm/s | $\Delta_{QS}$ , mm/s | $\Gamma$ , mm/s | Area (%) |
|--------|----------|-------------------|----------------------|-----------------|----------|
| 3FPy   | 295K     | -0.064            | 1.822                | 0.261           | 50       |
|        |          | 1.260             | 0.665                | 0.303           | 41       |
|        |          | 1.136             | 1.898                | 0.429           | 9        |
|        | 5K       | -0.088            | 1.802                | 0.266           | 50       |
|        |          | 0.670             | 0.076                | 0.292           | 36       |
| 1.463  |          | 2.026             | 0.384                | 13              |          |
| 3CIPy  | 295K     | 0.036             | 1.942                | 0.325           | 52       |
|        |          | 1.216             | 0.781                | 0.325           | 44       |
|        |          | 1.344             | 2.029                | 0.284           | 4        |
|        | 5K       | 0.076             | 1.858                | 0.281           | 53       |
|        |          | 1.446             | 1.182                | 0.345           | 38       |
| 1.438  |          | 2.311             | 0.386                | 9               |          |
| 3BrPy  | 295K     | 0.019             | 1.884                | 0.278           | 51       |
|        |          | 1.277             | 0.829                | 0.328           | 46       |
|        |          | 1.240             | 2.231                | 0.291           | 3        |
|        | 5K       | 0.075             | 1.851                | 0.268           | 51       |
|        |          | 1.464             | 1.135                | 0.369           | 39       |
| 1.497  |          | 1.617             | 0.376                | 10              |          |
| 3IPy   | 295K     | 0.022             | 1.808                | 0.306           | 48       |
|        |          | 1.305             | 0.855                | 0.324           | 43       |
|        |          | 1.376             | 2.173                | 0.338           | 9        |
|        | 5K       | 0.065             | 1.836                | 0.272           | 49       |

|  |  |       |       |       |    |
|--|--|-------|-------|-------|----|
|  |  | 1.365 | 1.440 | 0.338 | 27 |
|  |  | 1.558 | 1.467 | 0.322 | 24 |

\*) The value of  $\delta$  is reported relative to sodium nitroprusside at room temperature.

Table S11. Mössbauer parameters ( $\delta$ ,  $\Delta_{QS}$ ,  $\Gamma$ ) at 5 and 295 K for a series of pillared ferrous nitroprussides, according to reference 48.

| Ligand                          | Temp (K) | $\delta^*$ , mm/s | $\Delta_{QS}$ , mm/s | $\Gamma$ , mm/s | Area (%) |
|---------------------------------|----------|-------------------|----------------------|-----------------|----------|
| 1,3-oxazole                     | 295K     | -0.013            | 1.772                | 0.26            | 50       |
|                                 |          | 1.236             | 1.209                | 0.31            | 50       |
|                                 | 5K       | 0.002             | 1.848                | 0.27            | 50       |
|                                 |          | 1.396             | 2.131                | 0.28            | 50       |
| pyridine-3-carbaldehyde         | 295K     | 0.061             | 1.946                | 0.295           | 51       |
|                                 |          | 1.199             | 0.728                | 0.273           | 42       |
|                                 |          | 1.213             | 1.707                | 0.358           | 7        |
|                                 | 5K       | 0.083             | 1.831                | 0.28            | 50       |
|                                 |          | 1.459             | 1.147                | 0.42            | 44       |
| 1.551                           | 2.401    | 0.44              | 6                    |                 |          |
| 1H-pyrazole                     | 295K     | -0.014            | 1.860                | 0.27            | 51       |
|                                 |          | 1.344             | 1.691                | 0.31            | 49       |
|                                 | 5K       | 0.088             | 1.879                | 0.27            | 49       |
|                                 |          | 1.499             | 1.612                | 0.298           | 31       |
| 1.492                           | 2.238    | 0.38              | 19                   |                 |          |
| Imidazo[1,2-a]pyridine          | 295K     | -0.129            | 1.789                | 0.298           | 51       |
|                                 |          | 1.191             | 1.434                | 0.418           | 42       |
|                                 |          | 1.130             | 1.822                | 0.403           | 7        |
|                                 | 5K       | -0.003            | 1.850                | 0.269           | 48       |
|                                 |          | 1.383             | 2.304                | 0.315           | 28       |
|                                 |          | 1.388             | 1.671                | 0.270           | 18       |
| 0.919**                         | ----     | 0.372             | 6                    |                 |          |
| Pyridazine                      | 295K     | -0.098            | 1.701                | 0.268           | 50       |
|                                 |          | 1.224             | 0.989                | 0.388           | 31       |
|                                 |          | 1.334             | 2.744                | 0.459           | 19       |
|                                 | 5K       | 0.012             | 1.690                | 0.285           | 50       |
|                                 |          | 1.461             | 3.296                | 0.327           | 45       |
| 1.529                           | 1.397    | 0.434             | 5                    |                 |          |
| 4-(2-pyridin-4-ylethyl)pyridine | 295K     | -0.021            | 1.885                | 0.261           | 51       |
|                                 |          | 1.306             | 0.847                | 0.302           | 43       |
|                                 |          | 1.299             | 2.008                | 0.368           | 6        |
|                                 | 5K       | 0.057             | 1.903                | 0.274           | 51       |
|                                 |          | 1.469             | 1.405                | 0.312           | 43       |
| 1.455                           | 1.631    | 0.268             | 6                    |                 |          |

\*) The value of  $\delta$  is reported relative to sodium nitroprusside at room temperature.

\*\* The apparent two low intensity doublets really correspond to lines 2, 3, 4 and 5 for the sextet of a Goethite impurity (6% of relative area).

Table S12. Mössbauer parameters at different temperatures for  $\text{Fe}_{\text{ext}}(\text{PyrDer})_2[\text{Fe}_{\text{int}}(\text{CN})_5\text{NO}]$  with PyrDer = 4MPy, 4AcPy, 4PyCA, according to reference 20.

| Ligand | Temp (K) | $\delta^*$ , mm/s | $\Delta_{\text{QS}}$ , mm/s | $\Gamma$ , mm/s | Area (%) |
|--------|----------|-------------------|-----------------------------|-----------------|----------|
| 4AcPy  | 295K     | 0.017             | 1.833                       | 0.28            | 50       |
|        |          | 1.290             | 0.939                       | 0.29            | 48       |
|        |          | 0.232             | 0.115                       | 0.29            | 2        |
|        | 5K       | 0.070             | 1.762                       | 0.26            | 50       |
|        |          | 1.495             | 1.222                       | 0.36            | 30       |
|        |          | 0.678             | 0.120                       | 0.33            | 20       |
| 4PyCA  | 295K     | -0.021            | 1.901                       | 0.26            | 50       |
|        |          | 1.313             | 0.934                       | 0.28            | 45       |
|        |          | 0.322             | 0.167                       | 0.30            | 5        |
|        | 5K       | 0.075             | 1.892                       | 0.27            | 50       |
|        |          | 0.742             | 0.277                       | 0.29            | 50       |
|        |          |                   |                             |                 |          |
| 4MPy   | 295K     | -0.047            | 1.875                       | 0.32            | 45       |
|        |          | 1.308             | 0.619                       | 0.39            | 33       |
|        |          | 0.593             | 0.628                       | 0.35            | 22       |
|        | 5K       | 0.059             | 1.905                       | 0.27            | 50       |
|        |          | 0.758             | 0.136                       | 0.29            | 50       |
|        |          |                   |                             |                 |          |

\*) The value of  $\delta$  is reported relative to sodium nitroprusside at room temperature. Fitting error in the values of  $\delta$  and  $\Delta$  is no higher than 0.001 mm/s. The error in the value of  $\Gamma$  remains below 0.01 mm/s.
